# Supplementary material
Source: MDPI journal article supplement (https://www.mdpi.com/2072-4292/14/4/954)
Supplement: s1 [file s1]

## Supplementary Materials

Table S1 – S4: Confusion matrices for each level based on UAS data and Random Forest. Each confusion matrix represents the accumulated values over 500 bootstrap iterations

Table S1

|           |                     | Prediction      |                     |               |            |                   |       |                   |
|-----------|---------------------|-----------------|---------------------|---------------|------------|-------------------|-------|-------------------|
| Reference | Basic surface types | Substrate types | Substrate types wet | Water shallow | Vegetation | Vegetation Shadow | Water | Producer Accuracy |
|           | Substrate types     | 41727           | 5206                | 143           | 545        | 35                | 0     | 88%               |
|           | Substrate types wet | 2860            | 30105               | 2847          | 572        | 0                 | 0     | 83%               |
|           | Water shallow       | 0               | 3509                | 23503         | 3          | 32                | 3317  | 77%               |
|           | Vegetation          | 100             | 802                 | 0             | 110780     | 3120              | 0     | 96%               |
|           | Vegetation Shadow   | 0               | 0                   | 108           | 6302       | 26517             | 75    | 80%               |
|           | Water               | 0               | 0                   | 2570          | 0          | 76                | 24820 | 90%               |
|           | User Accuracy       | 93%             | 76%                 | 81%           | 94%        | 89%               | 88%   |                   |

Table S2

| Vegetation units |                       | Prediction |           |                       |      |          | Producer Accuracy |
|------------------|-----------------------|------------|-----------|-----------------------|------|----------|-------------------|
|                  |                       | Woody      | Grassland | Herbaceous vegetation | Reed | Pioneers |                   |
| Reference        | Woody                 | 12367      | 127       | 1029                  | 886  | 437      | 83%               |
|                  | Grassland             | 0          | 4592      | 242                   | 0    | 1        | 95%               |
|                  | Herbaceous vegetation | 616        | 322       | 38244                 | 1156 | 513      | 94%               |
|                  | Reed                  | 755        | 0         | 1321                  | 6347 | 338      | 72%               |
|                  | Pioneers              | 49         | 10        | 541                   | 525  | 6109     | 84%               |
| User Accuracy    |                       | 90%        | 91%       | 92%                   | 71%  | 83%      |                   |

Table S3

|           |                       | Prediction      |                       |      |        |      |        |               |                   |
|-----------|-----------------------|-----------------|-----------------------|------|--------|------|--------|---------------|-------------------|
|           | Substrate types       | Layer of shells | Fine grained material | Wood | Gravel | Sand | Stones | Armour stones | Producer Accuracy |
| Reference | Layer of shells       | 2092            | 3                     | 324  | 337    | 194  | 174    | 132           | 64%               |
|           | Fine grained material | 1               | 3566                  | 468  | 901    | 284  | 18     | 3             | 68%               |
|           | Wood                  | 236             | 750                   | 1716 | 1068   | 924  | 61     | 483           | 33%               |
|           | Gravel                | 378             | 779                   | 920  | 9973   | 1569 | 55     | 39            | 73%               |
|           | Sand                  | 41              | 360                   | 1015 | 2070   | 6948 | 301    | 4             | 65%               |
|           | Stones                | 234             | 334                   | 520  | 399    | 105  | 844    | 595           | 28%               |
|           | Armour stones         | 105             | 357                   | 345  | 10     | 6    | 242    | 2863          | 73%               |
|           | User Accuracy         | 68%             | 58%                   | 32%  | 68%    | 69%  | 50%    | 70%           |                   |

Table S4

|  |                             | Prediction           |               |                |                 |                 |       |           |                   |                      |                      |              |               |            |                |                   |                             |          |               |         |                   |
|--|-----------------------------|----------------------|---------------|----------------|-----------------|-----------------|-------|-----------|-------------------|----------------------|----------------------|--------------|---------------|------------|----------------|-------------------|-----------------------------|----------|---------------|---------|-------------------|
|  | Dominant stands             | Agrostis stolonifera | Arctium lappa | Brassica nigra | Carduus crispus | Cirsium arvense | Woody | Grassland | Lythrum salicaria | Phalaris arundinacea | Phragmites australis | Populus spp. | Rubus caesius | Salix spp. | Pioneers small | Tanacetum vulgare | Tripleurospermum perforatum | Pioneers | Urtica dioica | Pasture | Producer Accuracy |
|  | Reference                   |                      |               |                |                 |                 |       |           |                   |                      |                      |              |               |            |                |                   |                             |          |               |         |                   |
|  | Agrostis stolonifera        | 437                  | 1             | 2              | 0               | 1               | 0     | 0         | 2                 | 593                  | 16                   | 44           | 52            | 2          | 0              | 26                | 0                           | 185      | 4             | 0       | 32%               |
|  | Arctium lappa               | 0                    | 3370          | 74             | 306             | 16              | 0     | 0         | 0                 | 0                    | 0                    | 0            | 2             | 0          | 0              | 3                 | 0                           | 0        | 125           | 1       | 86%               |
|  | Brassica nigra              | 0                    | 10            | 4509           | 532             | 18              | 0     | 0         | 0                 | 3                    | 0                    | 85           | 0             | 103        | 0              | 93                | 5                           | 1        | 570           | 0       | 76%               |
|  | Carduus crispus             | 0                    | 87            | 520            | 6910            | 37              | 1     | 0         | 0                 | 0                    | 0                    | 0            | 0             | 0          | 0              | 18                | 0                           | 0        | 400           | 0       | 87%               |
|  | Cirsium arvense             | 0                    | 119           | 320            | 646             | 391             | 6     | 0         | 0                 | 91                   | 4                    | 43           | 0             | 0          | 0              | 61                | 2                           | 0        | 242           | 0       | 20%               |
|  | Woody                       | 0                    | 44            | 5              | 59              | 0               | 2643  | 0         | 0                 | 3                    | 69                   | 202          | 0             | 96         | 0              | 0                 | 0                           | 0        | 114           | 0       | 82%               |
|  | Grassland                   | 0                    | 0             | 0              | 0               | 0               | 0     | 2201      | 0                 | 0                    | 0                    | 0            | 0             | 0          | 0              | 0                 | 0                           | 0        | 1             | 104     | 95%               |
|  | Lythrum salicaria           | 10                   | 61            | 0              | 0               | 0               | 0     | 0         | 933               | 68                   | 246                  | 1            | 0             | 37         | 0              | 0                 | 0                           | 11       | 1             | 0       | 68%               |
|  | Phalaris arundinacea        | 35                   | 0             | 290            | 0               | 40              | 0     | 0         | 6                 | 2742                 | 343                  | 32           | 72            | 132        | 0              | 13                | 12                          | 430      | 149           | 0       | 64%               |
|  | Phragmites australis        | 68                   | 7             | 0              | 0               | 0               | 0     | 0         | 70                | 244                  | 3429                 | 7            | 0             | 501        | 0              | 0                 | 0                           | 0        | 13            | 0       | 79%               |
|  | Populus spp.                | 34                   | 72            | 3              | 1               | 4               | 305   | 10        | 0                 | 51                   | 31                   | 4104         | 45            | 1806       | 2              | 62                | 11                          | 274      | 275           | 149     | 57%               |
|  | Rubus caesius               | 6                    | 0             | 214            | 1               | 3               | 0     | 0         | 0                 | 182                  | 1                    | 5            | 887           | 0          | 0              | 0                 | 0                           | 252      | 747           | 10      | 38%               |
|  | Salix spp.                  | 0                    | 0             | 2              | 0               | 0               | 260   | 0         | 0                 | 46                   | 632                  | 850          | 0             | 8335       | 0              | 0                 | 0                           | 0        | 3             | 0       | 82%               |
|  | Pioneers small              | 0                    | 0             | 0              | 1               | 0               | 0     | 20        | 0                 | 0                    | 0                    | 0            | 0             | 0          | 1039           | 0                 | 0                           | 76       | 9             | 33      | 88%               |
|  | Tanacetum vulgare           | 0                    | 415           | 420            | 151             | 34              | 0     | 14        | 0                 | 12                   | 9                    | 130          | 0             | 1          | 1              | 72                | 86                          | 66       | 365           | 0       | 4%                |
|  | Tripleurospermum perforatum | 0                    | 0             | 248            | 1               | 31              | 0     | 84        | 0                 | 12                   | 0                    | 16           | 0             | 0          | 0              | 2                 | 1345                        | 7        | 22            | 1       | 76%               |
|  | Pioneers                    | 81                   | 0             | 46             | 0               | 0               | 0     | 6         | 1                 | 201                  | 2                    | 24           | 49            | 0          | 199            | 1                 | 5                           | 2971     | 14            | 0       | 83%               |
|  | Urtica dioica               | 0                    | 21            | 392            | 323             | 158             | 0     | 0         | 7                 | 201                  | 302                  | 70           | 0             | 35         | 0              | 23                | 40                          | 0        | 10464         | 0       | 87%               |
|  | Pasture                     | 0                    | 0             | 0              | 1               | 0               | 0     | 63        | 0                 | 0                    | 0                    | 0            | 19            | 0          | 0              | 0                 | 0                           | 1        | 203           | 3103    | 92%               |
|  | User Accuracy               | 65%                  | 80%           | 64%            | 77%             | 53%             | 82%   | 92%       | 92%               | 62%                  | 67%                  | 73%          | 79%           | 75%        | 84%            | 19%               | 89%                         | 70%      | 76%           | 91%     |                   |

Figure S1 – S3: Violin plots (density distribution) of variation of producer's and user's accuracy over 500 bootstrap iterations based on UAS data and Random Forest. Sorted decreasing by producer's accuracy. Numbers of reference data are presented on x-axis. Median values over 500 iteration are represented by horizontal lines.

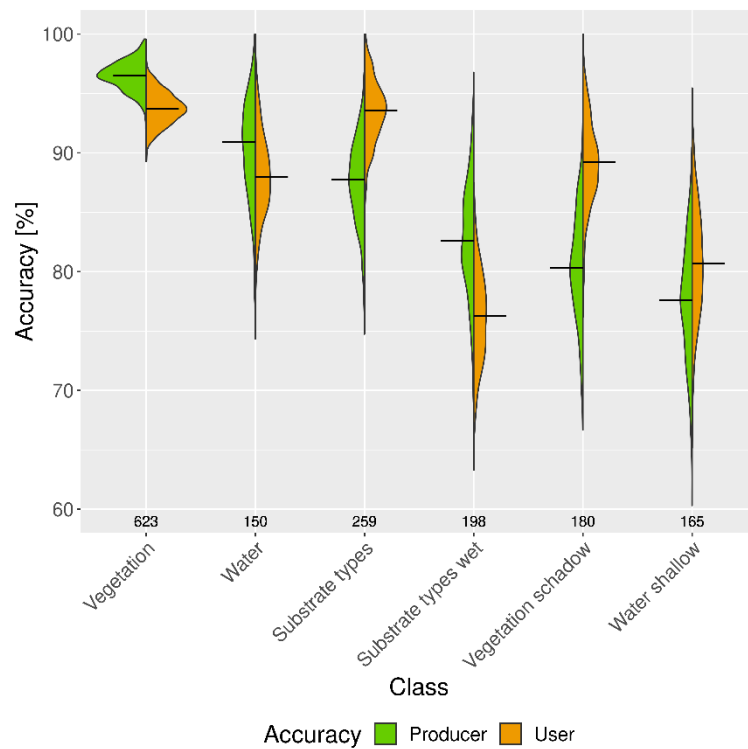

Figure S1 Classes of Basic surface types

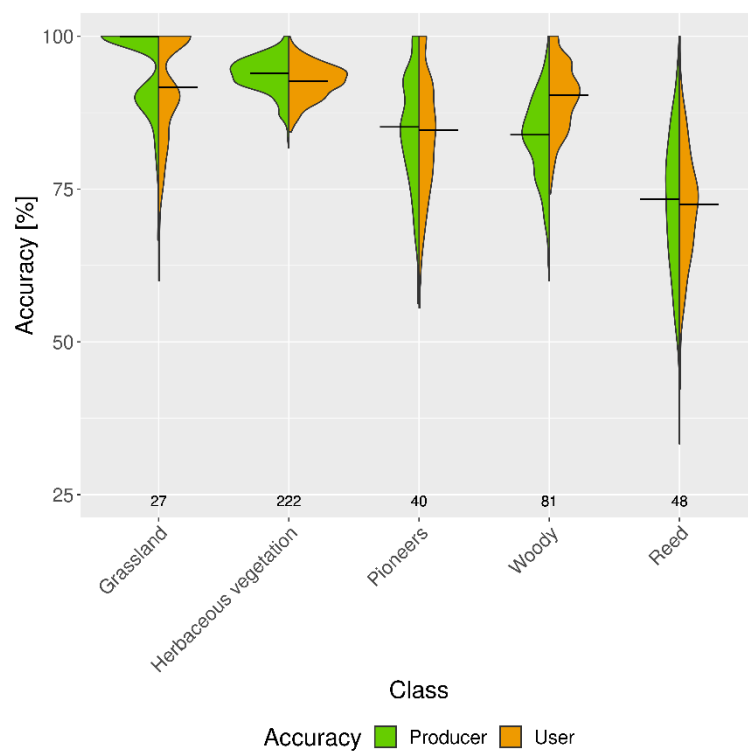

Figure S2 Classes of Vegetation units

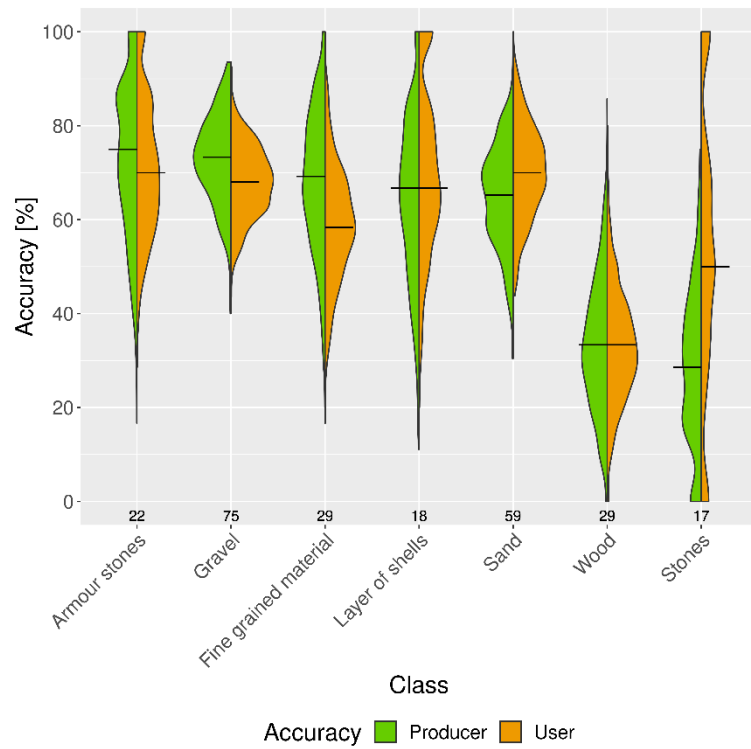

Figure S3 Classes of Substrate types

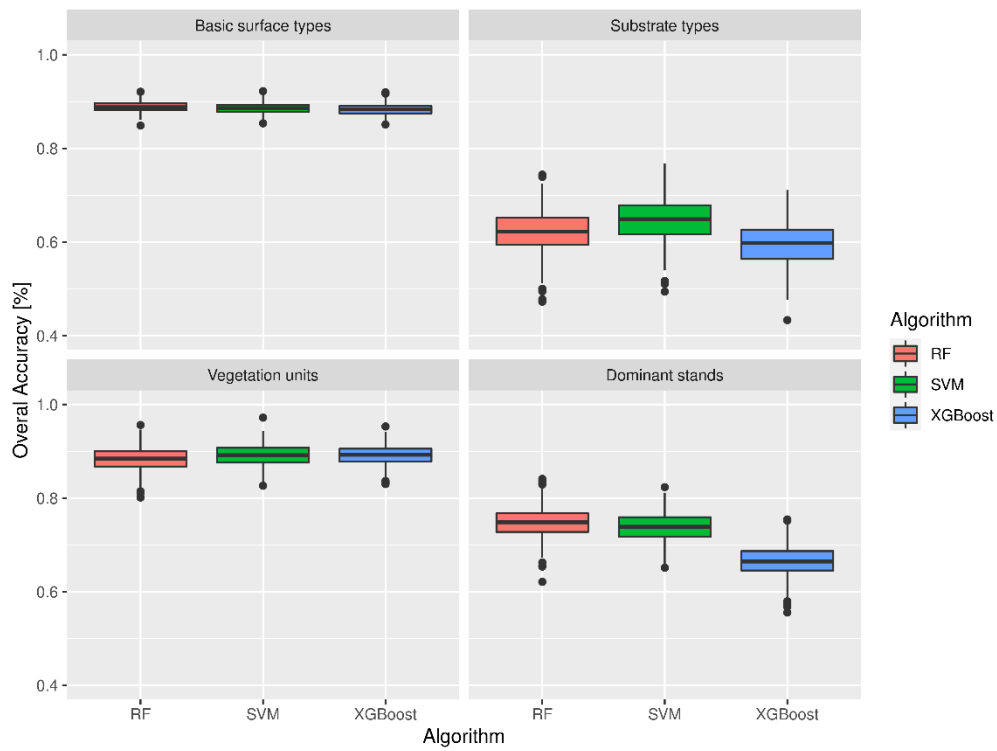

Figure S4 Overall Accuracy over 500 bootstrap iterations using UAS data

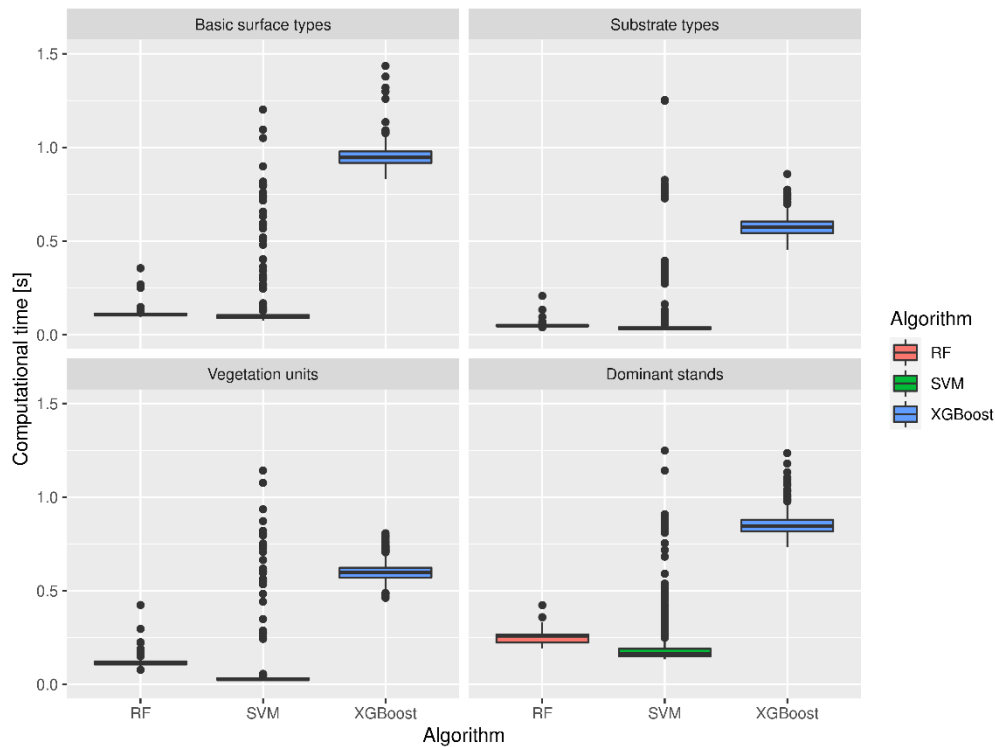

Figure S5 Computational time for one model over 500 bootstrap iterations using UAS data. The computation was run on a server with 32 CPU's and 126GB RAM

Figure S6 – S9: Feature selection using Gini Index (R package *ranger*) based on Random Forest and UAS data. The optimal number of the 63 available features were determined using forward feature selection. Abbreviations: mean (mn\_) and standard deviation (sd\_) for each segment; textural features: contrast (cont), dissimilarity (diss), entropy (entr), homogeneity (hom), mean (mean) and angular second moment (sec); textural features: calculation based on red band and 17 x 17 moving window (\_17), 3 x 3 moving window (\_3), calculated based on near infrared band and segments (\_NIR); normalized digital surface model (nDSM), mean and standard deviation values of flood duration model (FDM\_mn and FDM\_sd); Spectral indices: normalized difference vegetation index (ndviI), green normalized difference index (gndvi), normalized difference red edge index (ndre), normalized difference water index, (ndwi), soil adjusted vegetation index (savi), simple ratio of the near infrared band and red bands (sr), green vegetation index (gvi) and total brightness (totbr); geometrical features: pixel number (no\_pix), mean difference to the neighbouring segments based on the nDSM (mdiff\_neig);

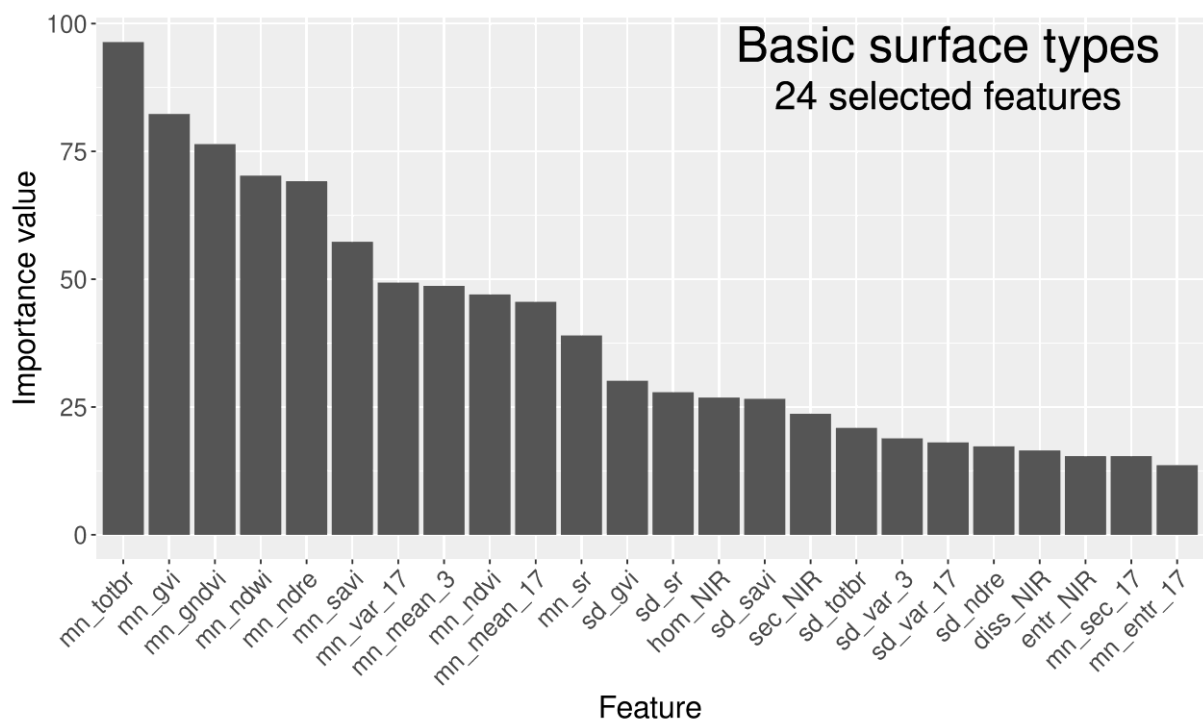

Figure S6

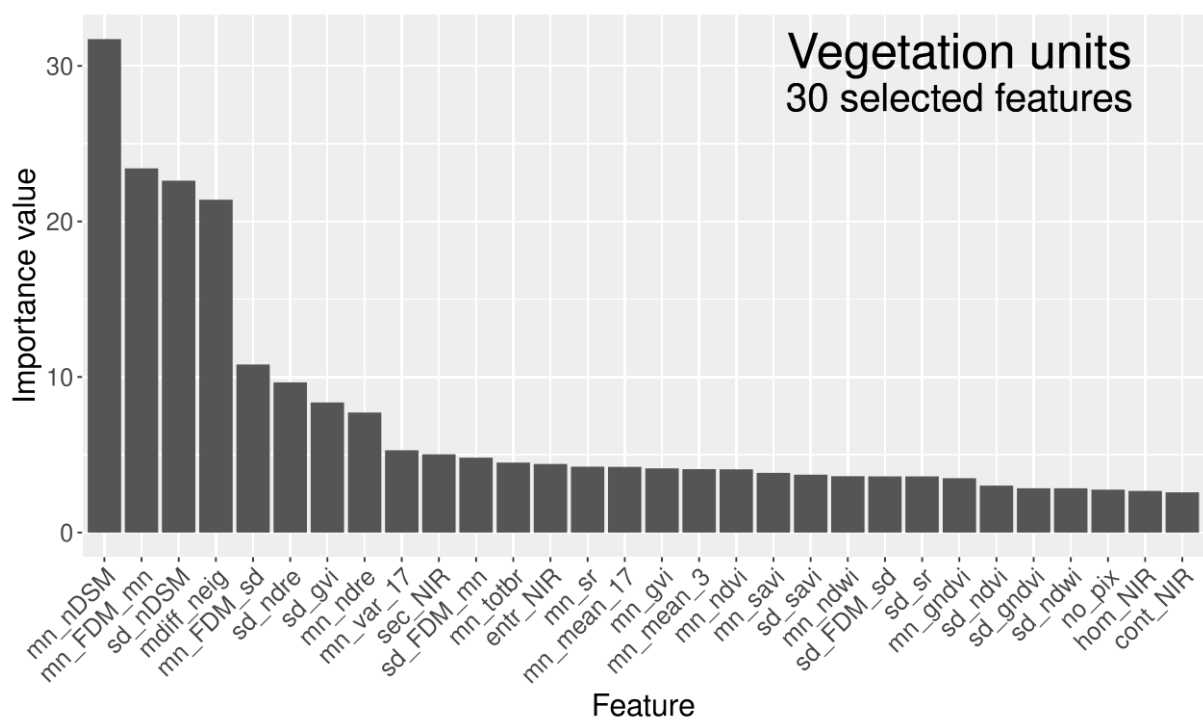

Figure S7

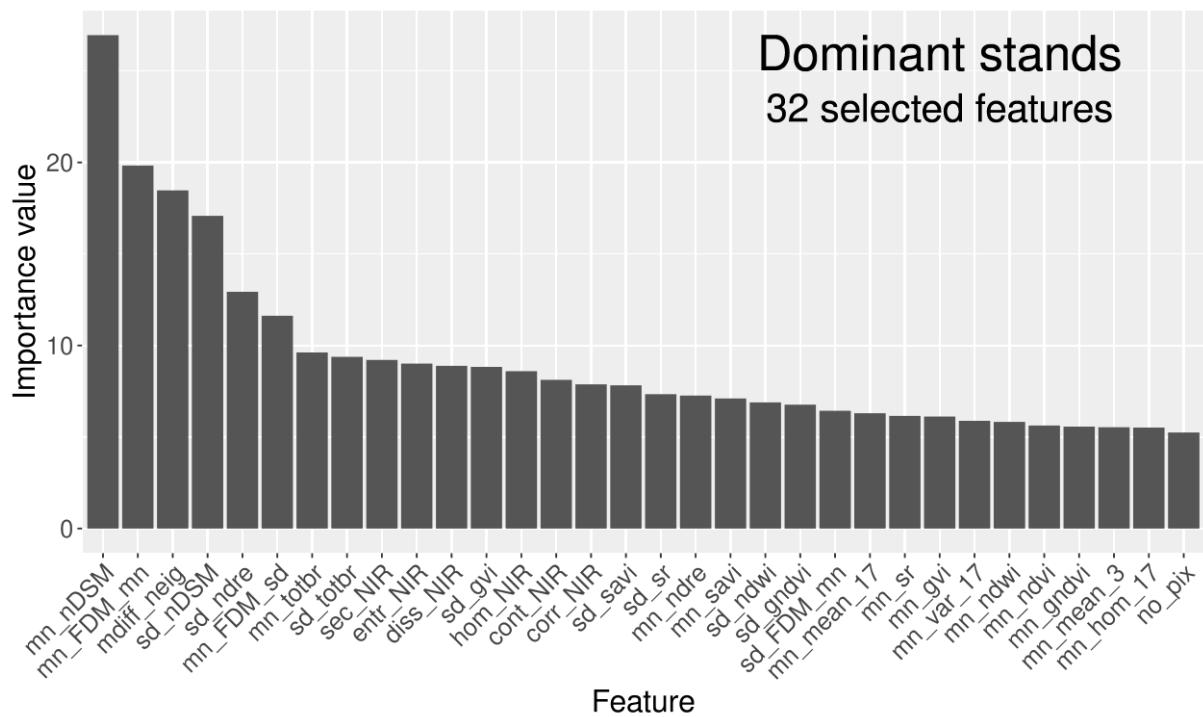

Figure S8

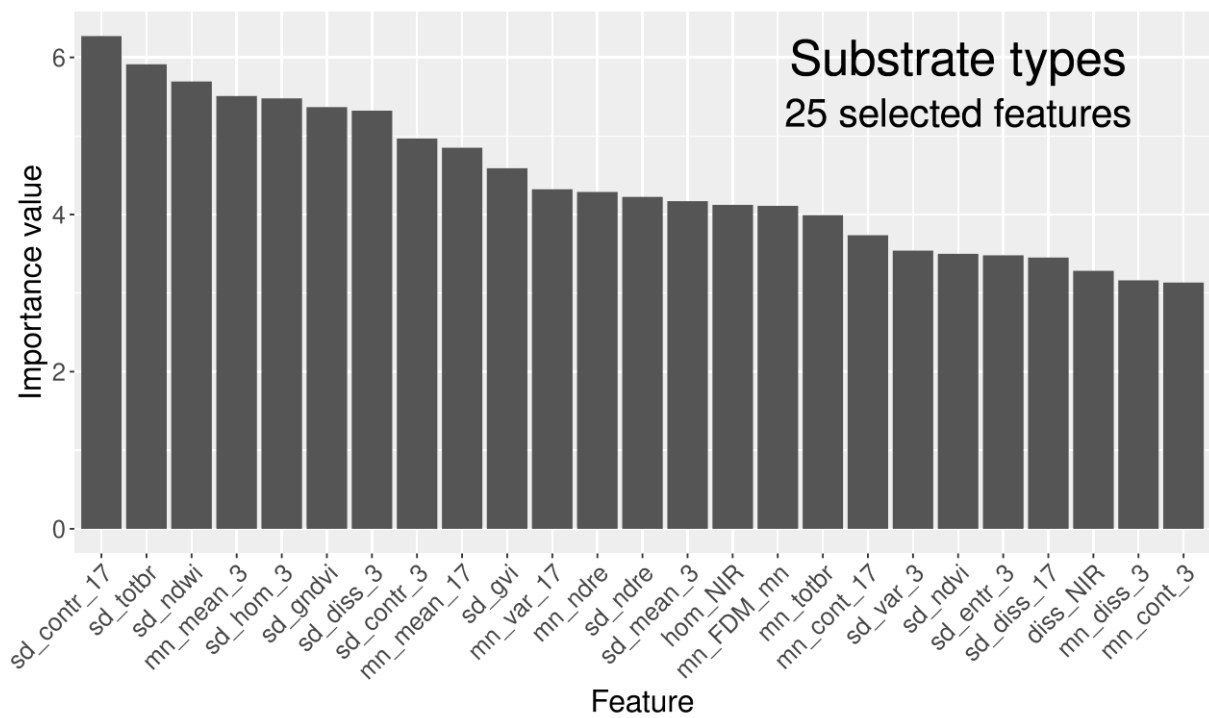

Figure S9
